# Supplementary material for: Changes in Mortality Inequalities in Urban and Rural Populations during 1990–2018: Lithuanian Experience
Source: MDPI journal article supplement (doi:10.3390/medicina57080750), 2021-07-25
Supplement: s1 [file s1]

# Supplementary material

Table S1. Average annual number of men and women in urban and rural areas during 1990-2018.

| Years | Men       |       |         |       | Women     |       |         |       | All       |       |           |       | All       |
|-------|-----------|-------|---------|-------|-----------|-------|---------|-------|-----------|-------|-----------|-------|-----------|
|       | Urban     |       | Rural   |       | Urban     |       | Rural   |       | Men       |       | Women     |       |           |
|       | N         | %     | N       | %     | N         | %     | N       | %     | N         | %     | N         | %     |           |
| 1990  | 1,186,550 | 32.09 | 562,674 | 15.22 | 1,333,779 | 36.07 | 614,835 | 16.63 | 1,749,224 | 47.30 | 1,948,614 | 52.70 | 3,697,838 |
| 1991  | 1,190,086 | 32.13 | 561,783 | 15.17 | 1,339,013 | 36.15 | 613,252 | 16.56 | 1,751,869 | 47.29 | 1,952,265 | 52.71 | 3,704,134 |
| 1992  | 1,186,067 | 32.05 | 563,316 | 15.22 | 1,334,858 | 36.08 | 615,873 | 16.64 | 1,749,383 | 47.28 | 1,950,731 | 52.72 | 3,700,114 |
| 1993  | 1,174,005 | 31.88 | 565,684 | 15.36 | 1,324,410 | 35.96 | 618,514 | 16.80 | 1,739,689 | 47.24 | 1,942,924 | 52.76 | 3,682,613 |
| 1994  | 1,158,894 | 31.69 | 566,396 | 15.49 | 1,313,393 | 35.91 | 618,461 | 16.91 | 1,725,290 | 47.18 | 1,931,854 | 52.82 | 3,657,144 |
| 1995  | 1,142,822 | 31.49 | 566,565 | 15.61 | 1,302,710 | 35.90 | 617,005 | 17.00 | 1,709,387 | 47.10 | 1,919,715 | 52.90 | 3,629,102 |
| 1996  | 1,132,093 | 31.43 | 561,610 | 15.59 | 1,298,685 | 36.06 | 609,225 | 16.92 | 1,693,703 | 47.03 | 1,907,910 | 52.97 | 3,601,613 |
| 1997  | 1,120,359 | 31.34 | 558,389 | 15.62 | 1,293,219 | 36.17 | 603,170 | 16.87 | 1,678,748 | 46.96 | 1,896,389 | 53.04 | 3,575,137 |
| 1998  | 1,105,127 | 31.14 | 559,480 | 15.76 | 1,282,726 | 36.14 | 601,998 | 16.96 | 1,664,607 | 46.90 | 1,884,724 | 53.10 | 3,549,331 |
| 1999  | 1,092,628 | 31.00 | 558,303 | 15.84 | 1,274,518 | 36.16 | 598,789 | 16.99 | 1,650,931 | 46.85 | 1,873,307 | 53.15 | 3,524,238 |
| 2000  | 1,079,945 | 30.86 | 557,671 | 15.94 | 1,265,695 | 36.17 | 596,225 | 17.04 | 1,637,616 | 46.80 | 1,861,920 | 53.20 | 3,499,536 |
| 2001  | 1,066,774 | 30.74 | 555,468 | 16.00 | 1,255,807 | 36.18 | 592,769 | 17.08 | 1,622,242 | 46.74 | 1,848,576 | 53.26 | 3,470,818 |
| 2002  | 1,055,835 | 30.67 | 551,491 | 16.02 | 1,247,188 | 36.22 | 588,553 | 17.09 | 1,607,326 | 46.68 | 1,835,741 | 53.32 | 3,443,067 |
| 2003  | 1,043,523 | 30.56 | 549,035 | 16.08 | 1,236,462 | 36.20 | 586,193 | 17.16 | 1,592,558 | 46.63 | 1,822,655 | 53.37 | 3,415,213 |
| 2004  | 1,027,547 | 30.43 | 545,594 | 16.16 | 1,221,661 | 36.18 | 582,273 | 17.24 | 1,573,141 | 46.58 | 1,803,934 | 53.42 | 3,377,075 |
| 2005  | 1,008,471 | 30.35 | 536,893 | 16.16 | 1,203,618 | 36.23 | 573,546 | 17.26 | 1,545,364 | 46.51 | 1,777,164 | 53.49 | 3,322,528 |
| 2006  | 990,840   | 30.30 | 526,789 | 16.11 | 1,188,167 | 36.34 | 564,113 | 17.25 | 1,517,629 | 46.41 | 1,752,280 | 53.59 | 3,269,909 |
| 2007  | 977,988   | 30.27 | 519,119 | 16.07 | 1,177,883 | 36.45 | 556,304 | 17.22 | 1,497,107 | 46.33 | 1,734,187 | 53.67 | 3,231,294 |
| 2008  | 966,638   | 30.22 | 513,748 | 16.06 | 1,168,270 | 36.53 | 549,575 | 17.18 | 1,480,386 | 46.29 | 1,717,845 | 53.71 | 3,198,231 |
| 2009  | 953,885   | 30.16 | 507,891 | 16.06 | 1,158,363 | 36.62 | 542,777 | 17.16 | 1,461,776 | 46.22 | 1,701,140 | 53.78 | 3,162,916 |
| 2010  | 931,128   | 30.06 | 497,583 | 16.07 | 1,136,967 | 36.71 | 531,604 | 17.16 | 1,428,711 | 46.13 | 1,668,571 | 53.87 | 3,097,282 |
| 2011  | 907,995   | 29.99 | 487,372 | 16.09 | 1,113,370 | 36.77 | 519,378 | 17.15 | 1,395,367 | 46.08 | 1,632,748 | 53.92 | 3,028,115 |
| 2012  | 896,102   | 29.99 | 480,099 | 16.07 | 1,101,334 | 36.86 | 510,238 | 17.08 | 1,376,201 | 46.06 | 1,611,572 | 53.94 | 2,987,773 |
| 2013  | 888,578   | 30.04 | 473,865 | 16.02 | 1,093,346 | 36.97 | 501,900 | 16.97 | 1,362,443 | 46.06 | 1,595,246 | 53.94 | 2,957,689 |
| 2014  | 881,978   | 30.08 | 469,148 | 16.00 | 1,086,618 | 37.06 | 494,623 | 16.87 | 1,351,126 | 46.08 | 1,581,241 | 53.92 | 2,932,367 |
| 2015  | 873,571   | 30.07 | 464,361 | 15.99 | 1,079,349 | 37.16 | 487,629 | 16.79 | 1,337,932 | 46.06 | 1,566,978 | 53.94 | 2,904,910 |
| 2016  | 860,905   | 30.02 | 459,992 | 16.04 | 1,066,243 | 37.17 | 481,091 | 16.77 | 1,320,897 | 46.05 | 1,547,334 | 53.95 | 2,868,231 |
| 2017  | 848,512   | 30.00 | 456,228 | 16.13 | 1,049,383 | 37.10 | 474,280 | 16.77 | 1,304,740 | 46.13 | 1,523,663 | 53.87 | 2,828,403 |
| 2018  | 842,614   | 30.08 | 453,828 | 16.20 | 1,037,432 | 37.03 | 467,669 | 16.69 | 1,296,442 | 46.28 | 1,505,101 | 53.72 | 2,801,543 |

Table S2. Number of deaths among men in urban and rural areas during 1990-2018.

| Years | Cardiovascular diseases |       |       |       | Cancer |       |       |      | External causes |       |       |      | Gastrointestinal diseases |      |       |      | Others |      |       |      | All causes |       |       |       | All   |
|-------|-------------------------|-------|-------|-------|--------|-------|-------|------|-----------------|-------|-------|------|---------------------------|------|-------|------|--------|------|-------|------|------------|-------|-------|-------|-------|
|       | Urban                   |       | Rural |       | Urban  |       | Rural |      | Urban           |       | Rural |      | Urban                     |      | Rural |      | Urban  |      | Rural |      | Urban      |       | Rural |       |       |
|       | N                       | %     | N     | %     | N      | %     | N     | %    | N               | %     | N     | %    | N                         | %    | N     | %    | N      | %    | N     | %    | N          | %     | N     | %     |       |
| 1990  | 5196                    | 25.25 | 4952  | 24.06 | 2275   | 11.06 | 1667  | 8.10 | 1926            | 9.36  | 1494  | 7.26 | 276                       | 1.34 | 161   | 0.78 | 1281   | 6.23 | 1350  | 6.56 | 10954      | 53.23 | 9624  | 46.77 | 20578 |
| 1991  | 5131                    | 23.63 | 4970  | 22.89 | 2340   | 10.78 | 1655  | 7.62 | 2325            | 10.71 | 1794  | 8.26 | 343                       | 1.58 | 179   | 0.82 | 1552   | 7.15 | 1425  | 6.56 | 11691      | 53.84 | 10023 | 46.16 | 21714 |
| 1992  | 5260                    | 23.73 | 4903  | 22.12 | 2357   | 10.63 | 1849  | 8.34 | 2326            | 10.49 | 1744  | 7.87 | 381                       | 1.72 | 189   | 0.85 | 1626   | 7.34 | 1529  | 6.90 | 11950      | 53.92 | 10214 | 46.08 | 22164 |
| 1993  | 5961                    | 24.04 | 5526  | 22.29 | 2418   | 9.75  | 1801  | 7.26 | 2971            | 11.98 | 1967  | 7.93 | 377                       | 1.52 | 226   | 0.91 | 1763   | 7.11 | 1782  | 7.19 | 13490      | 54.41 | 11302 | 45.59 | 24792 |
| 1994  | 5978                    | 23.60 | 5207  | 20.55 | 2454   | 9.69  | 1765  | 6.97 | 3205            | 12.65 | 2282  | 9.01 | 437                       | 1.72 | 217   | 0.86 | 2014   | 7.95 | 1775  | 7.01 | 14088      | 55.61 | 11246 | 44.39 | 25334 |
| 1995  | 5528                    | 22.76 | 5114  | 21.06 | 2522   | 10.39 | 1788  | 7.36 | 3011            | 12.40 | 2154  | 8.87 | 469                       | 1.93 | 224   | 0.92 | 1985   | 8.17 | 1488  | 6.13 | 13515      | 55.66 | 10768 | 44.34 | 24283 |
| 1996  | 5378                    | 23.54 | 5002  | 21.89 | 2469   | 10.81 | 1783  | 7.80 | 2551            | 11.17 | 1955  | 8.56 | 412                       | 1.80 | 224   | 0.98 | 1722   | 7.54 | 1352  | 5.92 | 12532      | 54.85 | 10316 | 45.15 | 22848 |
| 1997  | 5206                    | 24.10 | 4538  | 21.01 | 2454   | 11.36 | 1751  | 8.11 | 2403            | 11.12 | 1865  | 8.63 | 429                       | 1.99 | 225   | 1.04 | 1496   | 6.93 | 1235  | 5.72 | 11988      | 55.49 | 9614  | 44.51 | 21602 |
| 1998  | 5067                    | 23.91 | 4351  | 20.53 | 2471   | 11.66 | 1788  | 8.44 | 2306            | 10.88 | 1885  | 8.89 | 477                       | 2.25 | 263   | 1.24 | 1350   | 6.37 | 1235  | 5.83 | 11671      | 55.07 | 9522  | 44.93 | 21193 |
| 1999  | 5169                    | 24.65 | 4383  | 20.90 | 2505   | 11.94 | 1856  | 8.85 | 2175            | 10.37 | 1916  | 9.14 | 452                       | 2.16 | 225   | 1.07 | 1188   | 5.66 | 1103  | 5.26 | 11489      | 54.78 | 9483  | 45.22 | 20972 |
| 2000  | 5010                    | 24.55 | 4067  | 19.93 | 2566   | 12.57 | 1754  | 8.59 | 2241            | 10.98 | 1704  | 8.35 | 486                       | 2.38 | 217   | 1.06 | 1262   | 6.18 | 1101  | 5.39 | 11565      | 56.67 | 8843  | 43.33 | 20408 |
| 2001  | 5363                    | 24.86 | 4315  | 20.00 | 2611   | 12.10 | 1753  | 8.13 | 2416            | 11.20 | 1914  | 8.87 | 546                       | 2.53 | 273   | 1.27 | 1262   | 5.85 | 1118  | 5.18 | 12198      | 56.55 | 9373  | 43.45 | 21571 |
| 2002  | 5518                    | 25.29 | 4451  | 20.40 | 2567   | 11.77 | 1822  | 8.35 | 2256            | 10.34 | 1868  | 8.56 | 553                       | 2.53 | 296   | 1.36 | 1358   | 6.22 | 1127  | 5.17 | 12252      | 56.16 | 9564  | 43.84 | 21816 |
| 2003  | 5462                    | 24.99 | 4585  | 20.98 | 2587   | 11.83 | 1738  | 7.95 | 2237            | 10.23 | 1836  | 8.40 | 634                       | 2.90 | 311   | 1.42 | 1329   | 6.08 | 1140  | 5.22 | 12249      | 56.04 | 9610  | 43.96 | 21859 |
| 2004  | 5643                    | 25.81 | 4331  | 19.81 | 2618   | 11.97 | 1835  | 8.39 | 2144            | 9.80  | 1806  | 8.26 | 609                       | 2.79 | 305   | 1.39 | 1410   | 6.45 | 1166  | 5.33 | 12424      | 56.82 | 9443  | 43.18 | 21867 |
| 2005  | 6099                    | 26.08 | 4636  | 19.83 | 2620   | 11.20 | 1813  | 7.75 | 2388            | 10.21 | 1926  | 8.24 | 723                       | 3.09 | 362   | 1.55 | 1577   | 6.74 | 1240  | 5.30 | 13407      | 57.33 | 9977  | 42.67 | 23384 |
| 2006  | 6146                    | 25.81 | 4623  | 19.42 | 2828   | 11.88 | 1787  | 7.51 | 2286            | 9.60  | 1802  | 7.57 | 899                       | 3.78 | 486   | 2.04 | 1745   | 7.33 | 1207  | 5.07 | 13904      | 58.40 | 9905  | 41.60 | 23809 |
| 2007  | 6380                    | 25.85 | 4610  | 18.68 | 2917   | 11.82 | 1829  | 7.41 | 2261            | 9.16  | 1821  | 7.38 | 1069                      | 4.33 | 561   | 2.27 | 1909   | 7.73 | 1326  | 5.37 | 14536      | 58.89 | 10147 | 41.11 | 24683 |
| 2008  | 6065                    | 26.46 | 4344  | 18.95 | 2770   | 12.09 | 1743  | 7.61 | 2038            | 8.89  | 1636  | 7.14 | 979                       | 4.27 | 508   | 2.22 | 1632   | 7.12 | 1203  | 5.25 | 13484      | 58.84 | 9434  | 41.16 | 22918 |
| 2009  | 5992                    | 27.45 | 4124  | 18.89 | 2834   | 12.98 | 1753  | 8.03 | 1846            | 8.46  | 1437  | 6.58 | 805                       | 3.69 | 457   | 2.09 | 1502   | 6.88 | 1078  | 4.94 | 12979      | 59.46 | 8849  | 40.54 | 21828 |
| 2010  | 5973                    | 27.73 | 4157  | 19.30 | 2866   | 13.31 | 1706  | 7.92 | 1712            | 7.95  | 1413  | 6.56 | 842                       | 3.91 | 437   | 2.03 | 1459   | 6.77 | 971   | 4.51 | 12852      | 59.68 | 8684  | 40.32 | 21536 |
| 2011  | 6025                    | 28.77 | 3972  | 18.96 | 2792   | 13.33 | 1713  | 8.18 | 1605            | 7.66  | 1221  | 5.83 | 740                       | 3.53 | 416   | 1.99 | 1495   | 7.14 | 965   | 4.61 | 12657      | 60.43 | 8287  | 39.57 | 20944 |
| 2012  | 6021                    | 29.10 | 3863  | 18.67 | 2800   | 13.53 | 1668  | 8.06 | 1595            | 7.71  | 1195  | 5.78 | 754                       | 3.64 | 406   | 1.96 | 1450   | 7.01 | 939   | 4.54 | 12620      | 60.99 | 8071  | 39.01 | 20691 |
| 2013  | 5974                    | 28.74 | 3925  | 18.88 | 2711   | 13.04 | 1621  | 7.80 | 1628            | 7.83  | 1154  | 5.55 | 794                       | 3.82 | 415   | 2.00 | 1569   | 7.55 | 998   | 4.80 | 12676      | 60.97 | 8113  | 39.03 | 20789 |
| 2014  | 5741                    | 28.55 | 3709  | 18.44 | 2858   | 14.21 | 1666  | 8.28 | 1452            | 7.22  | 1115  | 5.54 | 730                       | 3.63 | 401   | 1.99 | 1504   | 7.48 | 934   | 4.64 | 12285      | 61.09 | 7825  | 38.91 | 20110 |
| 2015  | 5953                    | 29.00 | 3799  | 18.51 | 2907   | 14.16 | 1733  | 8.44 | 1424            | 6.94  | 971   | 4.73 | 743                       | 3.62 | 377   | 1.84 | 1629   | 7.94 | 993   | 4.84 | 12656      | 61.65 | 7873  | 38.35 | 20529 |
| 2016  | 5954                    | 29.29 | 3763  | 18.51 | 2907   | 14.30 | 1618  | 7.96 | 1380            | 6.79  | 938   | 4.61 | 814                       | 4.00 | 409   | 2.01 | 1633   | 8.03 | 912   | 4.49 | 12688      | 62.42 | 7640  | 37.58 | 20328 |
| 2017  | 5736                    | 29.74 | 3547  | 18.39 | 2726   | 14.13 | 1663  | 8.62 | 1174            | 6.09  | 861   | 4.46 | 695                       | 3.60 | 342   | 1.77 | 1629   | 8.45 | 913   | 4.73 | 11960      | 62.01 | 7326  | 37.99 | 19286 |
| 2018  | 5599                    | 29.43 | 3391  | 17.82 | 2843   | 14.94 | 1581  | 8.31 | 1078            | 5.67  | 793   | 4.17 | 646                       | 3.40 | 374   | 1.97 | 1780   | 9.36 | 939   | 4.94 | 11946      | 62.79 | 7078  | 37.21 | 19024 |

Table S3. Number of deaths among women in urban and rural areas during 1990-2018.

| Year<br>s | Cardiovascular diseases |       |       |       | Cancer |       |       |      | External causes |      |       |      | Gastrointestinal diseases |      |       |      | Others |      |       |      | All causes |       |       |       | All   |
|-----------|-------------------------|-------|-------|-------|--------|-------|-------|------|-----------------|------|-------|------|---------------------------|------|-------|------|--------|------|-------|------|------------|-------|-------|-------|-------|
|           | Urban                   |       | Rural |       | Urban  |       | Rural |      | Urban           |      | Rural |      | Urban                     |      | Rural |      | Urban  |      | Rural |      | Urban      |       | Rural |       |       |
|           | N                       | %     | N     | %     | N      | %     | N     | %    | N               | %    | N     | %    | N                         | %    | N     | %    | N      | %    | N     | %    | N          | %     | N     | %     |       |
| 1990      | 6365                    | 33.25 | 6477  | 33.84 | 1926   | 10.06 | 1089  | 5.69 | 585             | 3.06 | 434   | 2.27 | 285                       | 1.49 | 140   | 0.73 | 1011   | 5.28 | 829   | 4.33 | 10172      | 53.14 | 8969  | 46.86 | 19141 |
| 1991      | 6314                    | 32.74 | 6262  | 32.47 | 1978   | 10.26 | 1121  | 5.81 | 644             | 3.34 | 450   | 2.33 | 251                       | 1.30 | 140   | 0.73 | 1170   | 6.07 | 957   | 4.96 | 10357      | 53.70 | 8930  | 46.30 | 19287 |
| 1992      | 6208                    | 32.18 | 5945  | 30.82 | 1900   | 9.85  | 1201  | 6.23 | 664             | 3.44 | 478   | 2.48 | 288                       | 1.49 | 159   | 0.82 | 1247   | 6.46 | 1201  | 6.23 | 10307      | 53.43 | 8984  | 46.57 | 19291 |
| 1993      | 6794                    | 31.87 | 6768  | 31.75 | 2030   | 9.52  | 1257  | 5.90 | 827             | 3.88 | 483   | 2.27 | 256                       | 1.20 | 161   | 0.76 | 1300   | 6.10 | 1439  | 6.75 | 11207      | 52.58 | 10108 | 47.42 | 21315 |
| 1994      | 6907                    | 32.65 | 6256  | 29.58 | 2083   | 9.85  | 1166  | 5.51 | 902             | 4.26 | 529   | 2.50 | 306                       | 1.45 | 150   | 0.71 | 1367   | 6.46 | 1486  | 7.03 | 11565      | 54.68 | 9587  | 45.32 | 21152 |
| 1995      | 7008                    | 33.33 | 6655  | 31.66 | 2073   | 9.86  | 1167  | 5.55 | 840             | 4.00 | 534   | 2.54 | 331                       | 1.57 | 169   | 0.80 | 1278   | 6.08 | 968   | 4.60 | 11530      | 54.84 | 9493  | 45.16 | 21023 |
| 1996      | 6674                    | 33.29 | 6433  | 32.09 | 2116   | 10.55 | 1149  | 5.73 | 797             | 3.98 | 545   | 2.72 | 290                       | 1.45 | 178   | 0.89 | 1057   | 5.27 | 809   | 4.04 | 10934      | 54.54 | 9114  | 45.46 | 20048 |
| 1997      | 6607                    | 33.81 | 6399  | 32.75 | 2072   | 10.60 | 1124  | 5.75 | 695             | 3.56 | 480   | 2.46 | 317                       | 1.62 | 178   | 0.91 | 937    | 4.80 | 732   | 3.75 | 10628      | 54.39 | 8913  | 45.61 | 19541 |
| 1998      | 6591                    | 33.69 | 6279  | 32.09 | 2128   | 10.88 | 1199  | 6.13 | 720             | 3.68 | 447   | 2.28 | 379                       | 1.94 | 204   | 1.04 | 924    | 4.72 | 693   | 3.54 | 10742      | 54.91 | 8822  | 45.09 | 19564 |
| 1999      | 6429                    | 33.78 | 5922  | 31.12 | 2160   | 11.35 | 1229  | 6.46 | 698             | 3.67 | 479   | 2.52 | 397                       | 2.09 | 167   | 0.88 | 867    | 4.56 | 683   | 3.59 | 10551      | 55.44 | 8480  | 44.56 | 19031 |
| 2000      | 6266                    | 33.85 | 5588  | 30.19 | 2169   | 11.72 | 1234  | 6.67 | 672             | 3.63 | 485   | 2.62 | 378                       | 2.04 | 192   | 1.04 | 882    | 4.76 | 645   | 3.48 | 10367      | 56.00 | 8144  | 44.00 | 18511 |
| 2001      | 6475                    | 34.39 | 5716  | 30.36 | 2277   | 12.09 | 1155  | 6.13 | 716             | 3.80 | 452   | 2.40 | 417                       | 2.21 | 200   | 1.06 | 850    | 4.51 | 570   | 3.03 | 10735      | 57.02 | 8093  | 42.98 | 18828 |
| 2002      | 6630                    | 34.43 | 5732  | 29.77 | 2242   | 11.64 | 1239  | 6.43 | 688             | 3.57 | 467   | 2.43 | 438                       | 2.27 | 223   | 1.16 | 925    | 4.80 | 672   | 3.49 | 10923      | 56.73 | 8333  | 43.27 | 19256 |
| 2003      | 6473                    | 33.84 | 5775  | 30.19 | 2300   | 12.02 | 1214  | 6.35 | 682             | 3.56 | 486   | 2.54 | 452                       | 2.36 | 212   | 1.11 | 926    | 4.84 | 611   | 3.19 | 10833      | 56.63 | 8298  | 43.37 | 19131 |
| 2004      | 6780                    | 34.82 | 5777  | 29.67 | 2297   | 11.80 | 1209  | 6.21 | 655             | 3.36 | 468   | 2.40 | 458                       | 2.35 | 260   | 1.34 | 936    | 4.81 | 633   | 3.25 | 11126      | 57.14 | 8347  | 42.86 | 19473 |
| 2005      | 7073                    | 34.65 | 6015  | 29.46 | 2387   | 11.69 | 1228  | 6.02 | 701             | 3.43 | 534   | 2.62 | 502                       | 2.46 | 298   | 1.46 | 997    | 4.88 | 680   | 3.33 | 11660      | 57.11 | 8755  | 42.89 | 20415 |
| 2006      | 7533                    | 35.86 | 6019  | 28.66 | 2332   | 11.10 | 1201  | 5.72 | 735             | 3.50 | 513   | 2.44 | 615                       | 2.93 | 341   | 1.62 | 1075   | 5.12 | 640   | 3.05 | 12290      | 58.51 | 8714  | 41.49 | 21004 |
| 2007      | 7398                    | 35.33 | 5919  | 28.27 | 2355   | 11.25 | 1181  | 5.64 | 654             | 3.12 | 510   | 2.44 | 709                       | 3.39 | 386   | 1.84 | 1144   | 5.46 | 685   | 3.27 | 12260      | 58.55 | 8681  | 41.45 | 20941 |
| 2008      | 7358                    | 35.18 | 5856  | 28.00 | 2545   | 12.17 | 1208  | 5.78 | 649             | 3.10 | 462   | 2.21 | 680                       | 3.25 | 377   | 1.80 | 1147   | 5.48 | 632   | 3.02 | 12379      | 59.19 | 8535  | 40.81 | 20914 |
| 2009      | 7464                    | 36.94 | 5712  | 28.27 | 2406   | 11.91 | 1137  | 5.63 | 500             | 2.47 | 385   | 1.91 | 608                       | 3.01 | 353   | 1.75 | 1015   | 5.02 | 624   | 3.09 | 11993      | 59.36 | 8211  | 40.64 | 20204 |
| 2010      | 7660                    | 37.21 | 5837  | 28.36 | 2342   | 11.38 | 1196  | 5.81 | 554             | 2.69 | 366   | 1.78 | 609                       | 2.96 | 329   | 1.60 | 1097   | 5.33 | 594   | 2.89 | 12262      | 59.57 | 8322  | 40.43 | 20584 |
| 2011      | 7537                    | 37.51 | 5552  | 27.63 | 2450   | 12.19 | 1151  | 5.73 | 548             | 2.73 | 346   | 1.72 | 608                       | 3.03 | 294   | 1.46 | 1022   | 5.09 | 585   | 2.91 | 12165      | 60.54 | 7928  | 39.46 | 20093 |
| 2012      | 7884                    | 38.94 | 5402  | 26.68 | 2365   | 11.68 | 1165  | 5.75 | 526             | 2.60 | 344   | 1.70 | 559                       | 2.76 | 346   | 1.71 | 1076   | 5.31 | 580   | 2.86 | 12410      | 61.29 | 7837  | 38.71 | 20247 |
| 2013      | 7921                    | 38.23 | 5541  | 26.74 | 2415   | 11.65 | 1125  | 5.43 | 499             | 2.41 | 327   | 1.58 | 682                       | 3.29 | 343   | 1.66 | 1210   | 5.84 | 659   | 3.18 | 12727      | 61.42 | 7995  | 38.58 | 20722 |
| 2014      | 7831                    | 38.88 | 5241  | 26.02 | 2412   | 11.97 | 1091  | 5.42 | 479             | 2.38 | 288   | 1.43 | 629                       | 3.12 | 330   | 1.64 | 1187   | 5.89 | 654   | 3.25 | 12538      | 62.25 | 7604  | 37.75 | 20142 |
| 2015      | 8254                    | 38.85 | 5582  | 26.27 | 2538   | 11.95 | 1170  | 5.51 | 506             | 2.38 | 298   | 1.40 | 636                       | 2.99 | 342   | 1.61 | 1260   | 5.93 | 661   | 3.11 | 13194      | 62.10 | 8053  | 37.90 | 21247 |
| 2016      | 8194                    | 39.44 | 5192  | 24.99 | 2543   | 12.24 | 1129  | 5.43 | 481             | 2.31 | 263   | 1.27 | 620                       | 2.98 | 322   | 1.55 | 1356   | 6.53 | 678   | 3.26 | 13194      | 63.50 | 7584  | 36.50 | 20778 |
| 2017      | 8049                    | 38.59 | 5176  | 24.82 | 2440   | 11.70 | 1167  | 5.60 | 509             | 2.44 | 264   | 1.27 | 614                       | 2.94 | 342   | 1.64 | 1544   | 7.40 | 751   | 3.60 | 13156      | 63.08 | 7700  | 36.92 | 20856 |
| 2018      | 7975                    | 38.81 | 4953  | 24.10 | 2487   | 12.10 | 1116  | 5.43 | 478             | 2.33 | 260   | 1.27 | 591                       | 2.88 | 289   | 1.41 | 1614   | 7.85 | 787   | 3.83 | 13145      | 63.97 | 7405  | 36.03 | 20550 |

Table S4. Age-standardized mortality rates (ASMR) from all causes and major causes among men in 1990-2018 (100,000 population).

| Years | Cardiovascular diseases    |                             | Cancer                     |                             | External causes            |                             | Gastrointestinal diseases |                          | All causes                    |                                |
|-------|----------------------------|-----------------------------|----------------------------|-----------------------------|----------------------------|-----------------------------|---------------------------|--------------------------|-------------------------------|--------------------------------|
|       | Urban<br>ASMR (95% CI)     | Rural<br>ASMR (95% CI)      | Urban<br>ASMR (95% CI)     | Rural<br>ASMR (95% CI)      | Urban<br>ASMR (95% CI)     | Rural<br>ASMR (95% CI)      | Urban<br>ASMR (95% CI)    | Rural<br>ASMR (95% CI)   | Urban<br>ASMR (95% CI)        | Rural<br>ASMR (95% CI)         |
| 1990  | 720.32<br>(700.08; 740.56) | 758.33<br>(736.63; 780.03)  | 288.4<br>(275.84; 300.96)  | 283.59<br>(269.45; 297.73)  | 178.67<br>(170.15; 187.19) | 276.01*<br>(261.55; 290.47) | 32.49<br>(28.39; 36.59)   | 27.27<br>(22.81; 31.73)  | 1367.07<br>(1340.49; 1393.65) | 1567.25*<br>(1535.25; 1599.25) |
| 1991  | 691.84<br>(672.34; 711.34) | 771.10*<br>(749.2; 793.00)  | 287.79<br>(275.53; 300.05) | 277.25<br>(263.37; 291.13)  | 205.54<br>(196.6; 214.48)  | 333.81*<br>(317.87; 349.75) | 39.63<br>(35.15; 44.11)   | 31.86<br>(27.02; 36.7)   | 1395.85<br>(1369.59; 1422.11) | 1650.85*<br>(1617.95; 1683.75) |
| 1992  | 696.6<br>(677.28; 715.92)  | 766.92*<br>(745.02; 788.82) | 287.46<br>(275.3; 299.62)  | 313<br>(298.26; 327.74)     | 210.44<br>(201.36; 219.52) | 324.47*<br>(308.73; 340.21) | 44.46<br>(39.72; 49.2)    | 33.67<br>(28.69; 38.65)  | 1422.35<br>(1396.09; 1448.61) | 1688.15*<br>(1654.91; 1721.39) |
| 1993  | 774.09<br>(754.01; 794.17) | 834.57*<br>(847.95; 894.71) | 295.75<br>(283.37; 308.13) | 305.39<br>(290.83; 319.95)  | 269.12<br>(258.84; 279.4)  | 367.88*<br>(351.08; 384.68) | 43.31<br>(38.69; 47.93)   | 40.31<br>(34.81; 45.81)  | 1580.76<br>(1553.4; 1608.12)  | 1879.65*<br>(1844.57; 1914.73) |
| 1994  | 776.05<br>(755.95; 796.15) | 832.19*<br>(809.25; 855.13) | 297.17<br>(284.87; 309.47) | 300.82<br>(286.34; 315.3)   | 294.96<br>(284.24; 305.68) | 425.00*<br>(407; 443)       | 48.86<br>(44.04; 53.68)   | 39.33<br>(33.89; 44.77)  | 1642.85<br>(1615.07; 1670.63) | 1896*<br>(1860.56; 1931.44)    |
| 1995  | 717.64<br>(698.34; 736.94) | 871.33*<br>(811.49; 857.65) | 304.99<br>(292.57; 317.41) | 306.46<br>(291.82; 321.1)   | 283.00<br>(272.42; 293.58) | 405.56*<br>(387.88; 423.24) | 51.54<br>(46.64; 56.44)   | 41.36<br>(35.74; 46.98)  | 1574.75<br>(1547.61; 1601.89) | 1850.1*<br>(1814.86; 1885.34)  |
| 1996  | 696.49<br>(677.61; 715.37) | 836.55*<br>(813.39; 859.71) | 289.4<br>(277.54; 301.26)  | 311.92<br>(297.02; 326.82)  | 238.51<br>(228.87; 248.15) | 365.53*<br>(348.81; 382.25) | 45.8<br>(41.16; 50.44)    | 40.69<br>(35.17; 46.21)  | 1460.92<br>(1434.92; 1486.92) | 1797.5*<br>(1762.74; 1832.26)  |
| 1997  | 664.65<br>(646.35; 682.95) | 772.20*<br>(749.84; 794.56) | 284.88<br>(273.18; 296.58) | 307.37<br>(292.57; 322.17)  | 228.27<br>(218.75; 237.79) | 351.5*<br>(335.04; 367.96)  | 47.05<br>(42.39; 51.71)   | 40.69<br>(35.19; 46.19)  | 1391.18<br>(1365.92; 1416.44) | 1694.92*<br>(1661.04; 1728.8)  |
| 1998  | 636.53<br>(618.73; 654.33) | 745.50*<br>(723.52; 767.48) | 284.68<br>(273.08; 296.28) | 312.07*<br>(297.21; 326.93) | 221.37<br>(211.95; 230.79) | 350.58*<br>(334.26; 366.9)  | 50.39<br>(45.67; 55.11)   | 47.94<br>(41.94; 53.94)  | 1345.14<br>(1320.4; 1369.88)  | 1678.31*<br>(1644.69; 1711.93) |
| 1999  | 641.88<br>(624.12; 659.64) | 759.53*<br>(737.25; 781.81) | 284.22<br>(272.72; 295.72) | 322.15*<br>(307.11; 337.19) | 207.95<br>(198.85; 217.05) | 357.50*<br>(341.02; 373.98) | 48.50<br>(43.84; 53.16)   | 41.6<br>(35.98; 47.22)   | 1316.74<br>(1292.38; 1341.1)  | 1676.4*<br>(1642.82; 1709.98)  |
| 2000  | 615.80<br>(598.48; 633.12) | 706.55*<br>(684.97; 728.13) | 290.25<br>(278.67; 301.83) | 302.81<br>(288.25; 317.37)  | 215.33<br>(206.09; 224.57) | 316.58*<br>(301.12; 332.04) | 51.76<br>(46.96; 56.56)   | 39.26*<br>(33.86; 44.66) | 1315.03<br>(1290.79; 1339.27) | 1560.32*<br>(1527.86; 1592.78) |
| 2001  | 647.98<br>(630.36; 665.60) | 743.57*<br>(721.49; 765.65) | 289.8<br>(278.34; 301.26)  | 298.38<br>(284.02; 312.74)  | 232.95<br>(223.31; 242.59) | 355.31*<br>(338.91; 371.71) | 58.03<br>(52.97; 63.09)   | 49.42<br>(43.36; 55.48)  | 1369.68<br>(1345.12; 1394.24) | 1646.72*<br>(1613.46; 1679.98) |
| 2002  | 661.56<br>(643.78; 679.34) | 774.71*<br>(752.05; 797.37) | 280.6<br>(269.38; 291.82)  | 307.32*<br>(292.76; 321.88) | 218.16<br>(208.82; 227.5)  | 347.53*<br>(331.29; 363.77) | 57.38<br>(52.42; 62.34)   | 53.63<br>(47.31; 59.95)  | 1368.14<br>(1343.64; 1392.64) | 1683.61*<br>(1649.93; 1717.29) |
| 2003  | 643.75<br>(626.25; 661.25) | 803.73*<br>(780.47; 826.99) | 280.71<br>(269.49; 291.93) | 294.47<br>(280.13; 308.81)  | 216.39<br>(207.11; 225.67) | 339.83*<br>(323.81; 355.85) | 64.98<br>(59.74; 70.22)   | 55.53<br>(49.13; 61.93)  | 1351.43<br>(1327.17; 1375.69) | 1694.73*<br>(1660.85; 1728.61) |
| 2004  | 645.43<br>(628.07; 662.79) | 758.37*<br>(735.49; 781.25) | 278.06<br>(267; 289.12)    | 309.79*<br>(295.07; 324.51) | 208.9<br>(199.76; 218.04)  | 333.39*<br>(317.55; 349.23) | 61.7<br>(56.6; 66.8)      | 54.55<br>(48.21; 60.89)  | 1346.02<br>(1321.94; 1370.1)  | 1664.38*<br>(1630.56; 1698.2)  |
| 2005  | 682.3<br>(664.7; 699.9)    | 816.43*<br>(792.61; 840.25) | 272.95<br>(262.13; 283.77) | 306.82*<br>(292.14; 321.5)  | 234.43<br>(224.73; 244.13) | 359.96*<br>(343.4; 376.52)  | 73.45<br>(67.89; 79.01)   | 65.23<br>(58.27; 72.19)  | 1432.05<br>(1407.45; 1456.65) | 1773.87*<br>(1738.83; 1808.91) |
| 2006  | 671.25<br>(654.01; 688.49) | 809.26*<br>(785.6; 832.92)  | 291.62<br>(280.5; 302.74)  | 304.54<br>(289.86; 319.22)  | 227.37<br>(217.77; 236.97) | 336.24*<br>(320.24; 352.24) | 90.29<br>(84.17; 96.41)   | 86.14<br>(78.22; 94.06)  | 1466.32<br>(1441.62; 1491.02) | 1754.22*<br>(1719.4; 1789.04)  |
| 2007  | 682.36<br>(665.24; 699.48) | 809.15*<br>(785.41; 832.89) | 297.62<br>(286.46; 308.78) | 311.67<br>(296.83; 326.51)  | 224.05<br>(214.55; 233.55) | 344.15*<br>(327.85; 360.45) | 106.06<br>(99.48; 112.64) | 102.08<br>(93.36; 110.8) | 1511.21<br>(1486.41; 1536.01) | 1802.64*<br>(1767.26; 1838.02) |
| 2008  | 641.75<br>(625.29; 658.21) | 759.74*<br>(736.78; 782.7)  | 280.47<br>(269.67; 291.27) | 300.1<br>(285.44; 314.76)   | 204.2<br>(195.08; 213.32)  | 313.38*<br>(297.74; 329.02) | 96.41<br>(90.17; 102.65)  | 92.16<br>(83.88; 100.44) | 1394.17<br>(1370.45; 1417.89) | 1687.2*<br>(1652.86; 1721.54)  |
| 2009  | 621.46<br>(605.44; 637.48) | 713.87*<br>(691.73; 736.01) | 285.7<br>(274.84; 296.56)  | 299.5<br>(284.94; 314.06)   | 184.31<br>(175.69; 192.93) | 273.78*<br>(259.2; 288.36)  | 80.7<br>(74.96; 86.44)    | 83.80<br>(75.84; 91.76)  | 1327.39<br>(1304.39; 1350.39) | 1562.72*<br>(1529.86; 1595.58) |
| 2010  | 606.05<br>(590.39; 621.71) | 726.64*<br>(704.32; 748.96) | 285.23<br>(274.45; 296.01) | 292.8 (278.42;<br>307.18)   | 174.97<br>(166.47; 183.47) | 272.01*<br>(257.41; 286.61) | 85.89<br>(79.91; 91.87)   | 81.36<br>(73.48; 89.24)  | 1301.39<br>(1278.75; 1324.03) | 1548.16*<br>(1515.4; 1580.92)  |
| 2011  | 596.45<br>(581.09; 611.81) | 694.2*<br>(672.34; 716.06)  | 271.32<br>(260.92; 281.72) | 298.26*<br>(283.68; 312.84) | 166.14<br>(157.8; 174.48)  | 234.1*<br>(220.56; 247.64)  | 75.22<br>(69.64; 80.8)    | 76.25<br>(68.69; 83.81)  | 1262.49<br>(1240.29; 1284.69) | 1478.29*<br>(1446.23; 1510.35) |
| 2012  | 586.59<br>(571.53; 601.65) | 668.92*<br>(647.5; 690.34)  | 270.71<br>(260.35; 281.07) | 287.12<br>(272.88; 301.36)  | 166.68<br>(158.3; 175.06)  | 232.59*<br>(218.99; 246.19) | 76.94<br>(71.28; 82.6)    | 75.56<br>(67.98; 83.14)  | 1247.13<br>(1225.19; 1269.07) | 1433.13*<br>(1401.55; 1464.71) |
| 2013  | 570.13<br>(555.47; 584.79) | 673.34*<br>(652.08; 694.6)  | 260.01<br>(249.91; 270.11) | 280.45<br>(266.35; 294.55)  | 170.42<br>(161.94; 178.9)  | 224.39*<br>(211.01; 237.77) | 80.40<br>(74.64; 86.16)   | 76.41<br>(68.81; 84.01)  | 1237.79<br>(1216.09; 1259.49) | 1434.91*<br>(1403.49; 1466.33) |
| 2014  | 539.32<br>(525.2; 553.44)  | 631.45*<br>(610.91; 651.99) | 270.93<br>(260.71; 281.15) | 287.05<br>(272.85; 301.25)  | 153.11<br>(145.03; 161.19) | 217.42*<br>(204.22; 230.62) | 73.83<br>(68.31; 79.35)   | 72.09<br>(64.79; 79.39)  | 1184.51<br>(1163.43; 1205.59) | 1377.47*<br>(1346.67; 1408.27) |
| 2015  | 548.57                     | 646.03*                     | 274.5                      | 295.58                      | 149.92                     | 190.89*                     | 75.06                     | 68.58                    | 1207.18                       | 1377.35*                       |

|      |                            |                             |                            |                             |                            |                             |                         |                         |                               |                                |
|------|----------------------------|-----------------------------|----------------------------|-----------------------------|----------------------------|-----------------------------|-------------------------|-------------------------|-------------------------------|--------------------------------|
|      | (534.47; 562.67)           | (625.31; 666.75)            | (264.24; 284.76)           | (281.28; 309.88)            | (141.94; 157.9)            | (178.43; 203.35)            | (69.5; 80.62)           | (61.42; 75.74)          | (1186; 1228.36)               | (1346.77; 1407.93)             |
| 2016 | 544.04<br>(530.06; 558.02) | 630.6*<br>(610.32; 650.88)  | 273.73<br>(263.49; 283.97) | 276.63<br>(262.77; 290.49)  | 146.14<br>(138.2; 154.08)  | 182.94*<br>(170.78; 195.1)  | 82.39<br>(76.57; 88.21) | 72.76<br>(65.46; 80.06) | 1207.04<br>(1185.88; 1228.2)  | 1327.3*<br>(1297.34; 1357.26)  |
| 2017 | 515.10<br>(501.58; 528.62) | 589.78*<br>(570.24; 609.32) | 253.64<br>(243.82; 263.46) | 280.23*<br>(266.39; 294.07) | 124.30<br>(116.96; 131.64) | 169.57*<br>(157.79; 181.35) | 70.20<br>(64.82; 75.58) | 61.51<br>(54.71; 68.31) | 1118.62<br>(1098.38; 1138.86) | 1261.28*<br>(1232.22; 1290.34) |
| 2018 | 498.80<br>(485.54; 512.06) | 558.66*<br>(539.72; 577.6)  | 264.34<br>(254.32; 274.36) | 263.84<br>(250.46; 277.22)  | 114.44<br>(107.38; 121.5)  | 152.03*<br>(140.99; 163.07) | 64.32<br>(59.2; 69.44)  | 68.68<br>(61.42; 75.94) | 1112.12<br>(1091.94; 1132.3)  | 1205.8*<br>(1177.48; 1234.12)  |

CI, confidence intervals.

\*p < 0.05 compared to urban areas.

Table S5. Age-standardized mortality rates (ASMR) from all causes and major causes among women in 1990-2018 (100,000 population).

| Years | Cardiovascular diseases    |                             | Cancer                     |                             | External causes         |                          | Gastrointestinal diseases |                          | All causes                    |                             |
|-------|----------------------------|-----------------------------|----------------------------|-----------------------------|-------------------------|--------------------------|---------------------------|--------------------------|-------------------------------|-----------------------------|
|       | Urban<br>ASMR (95% CI)     | Rural<br>ASMR (95% CI)      | Urban<br>ASMR (95% CI)     | Rural<br>ASMR (95% CI)      | Urban<br>ASMR (95% CI)  | Rural<br>ASMR (95% CI)   | Urban<br>ASMR (95% CI)    | Rural<br>ASMR (95% CI)   | Urban<br>ASMR (95% CI)        | Rural<br>ASMR (95% CI)      |
| 1990  | 446.25<br>(435.15; 457.35) | 528.95*<br>(515.57; 542.33) | 149.46<br>(142.54; 156.38) | 126.41*<br>(118.13; 134.69) | 44.02<br>(40.34; 47.7)  | 64.22*<br>(57.58; 70.86) | 21.51<br>(18.91; 24.11)   | 15.11*<br>(12.33; 17.89) | 740.25<br>(725.67; 754.83)    | 828.75*<br>(810.17; 847.33) |
| 1991  | 471.54<br>(459.70; 483.38) | 513.31*<br>(500.03; 526.59) | 151.52<br>(144.62; 158.42) | 128.03*<br>(119.79; 136.27) | 48.35<br>(44.49; 52.21) | 68.55*<br>(61.61; 75.49) | 18.66<br>(16.26; 21.06)   | 14.48<br>(11.76; 17.2)   | 743.14<br>(728.62; 757.66)    | 833.91*<br>(815.07; 852.75) |
| 1992  | 420.76<br>(410.16; 431.36) | 481.45*<br>(468.63; 494.27) | 143.76<br>(137.1; 150.42)  | 136.16<br>(127.62; 144.7)   | 49.71<br>(45.81; 53.61) | 72.87*<br>(65.73; 80.01) | 21.25<br>(18.71; 23.79)   | 14.84*<br>(11.92; 17.76) | 730.31<br>(716.01; 744.61)    | 830.5*<br>(811.72; 849.28)  |
| 1993  | 458.01<br>(446.99; 469.03) | 547.99*<br>(534.39; 561.59) | 153.2<br>(146.34; 160.06)  | 141.54<br>(132.88; 150.2)   | 61.53<br>(57.17; 65.89) | 75.04*<br>(67.76; 82.32) | 19.20<br>(16.76; 21.64)   | 16.83<br>(13.91; 19.75)  | 789.34<br>(774.52; 804.16)    | 928.69*<br>(908.99; 948.39) |
| 1994  | 463.79<br>(452.71; 474.87) | 520.27*<br>(506.71; 533.83) | 155.15<br>(148.27; 162.03) | 131.59*<br>(123.19; 139.99) | 68.45<br>(63.83; 73.07) | 83.55*<br>(75.79; 91.31) | 22.48<br>(19.88; 25.08)   | 16.92<br>(13.84; 20)     | 812.99<br>(797.95; 828.03)    | 909.47*<br>(889.47; 929.47) |
| 1995  | 459.74<br>(448.9; 470.58)  | 553.49*<br>(539.65; 567.33) | 152.13<br>(145.37; 158.89) | 129.46*<br>(121.16; 137.76) | 63.97<br>(59.51; 68.43) | 83.19*<br>(75.45; 90.93) | 23.81<br>(21.15; 26.47)   | 19.46<br>(16.16; 22.76)  | 799.36<br>(784.56; 814.16)    | 897.88*<br>(878.12; 917.64) |
| 1996  | 429.58<br>(419.24; 439.92) | 535.95*<br>(522.41; 549.49) | 152<br>(145.32; 158.68)    | 131.37*<br>(122.87; 139.87) | 59.92<br>(55.62; 64.22) | 86.06*<br>(78.12; 94)    | 20.46<br>(18.02; 22.9)    | 19.26<br>(16.02; 22.5)   | 743.51<br>(729.39; 757.63)    | 870.87*<br>(851.31; 890.43) |
| 1997  | 413.87<br>(403.93; 423.81) | 533.39*<br>(520.03; 546.75) | 145.62<br>(139.16; 152.08) | 127.73*<br>(119.33; 136.13) | 52.09<br>(48.07; 56.11) | 75.64*<br>(68.22; 83.06) | 21.84<br>(19.36; 24.32)   | 20.28<br>(16.86; 23.7)   | 705.09<br>(691.55; 718.63)    | 847.63*<br>(828.49; 866.77) |
| 1998  | 409.84<br>(399.98; 419.7)  | 528.13*<br>(514.73; 541.53) | 146.95<br>(140.51; 153.39) | 136.18<br>(127.48; 144.88)  | 53.93<br>(49.83; 58.03) | 71.22*<br>(63.98; 78.46) | 26.33<br>(23.59; 29.07)   | 22.11<br>(18.67; 25.55)  | 705.49<br>(692.01; 718.97)    | 840.81*<br>(821.75; 859.87) |
| 1999  | 391.68<br>(382.18; 401.18) | 498.92*<br>(485.78; 512.06) | 147.11<br>(140.69; 153.53) | 138.81<br>(130.09; 147.53)  | 51.48<br>(47.52; 55.44) | 78.25*<br>(70.61; 85.89) | 27.12<br>(24.36; 29.88)   | 19.98*<br>(16.52; 23.44) | 680.65<br>(667.53; 693.77)    | 818.61*<br>(799.53; 837.69) |
| 2000  | 375.62<br>(366.38; 384.86) | 467.27*<br>(454.55; 479.99) | 145.44<br>(139.1; 151.78)  | 138.52<br>(129.78; 147.26)  | 49.54<br>(45.66; 53.42) | 76.53*<br>(69.09; 83.97) | 25.43<br>(22.77; 28.09)   | 20.66<br>(17.34; 23.98)  | 661.38<br>(648.48; 674.28)    | 779.34*<br>(760.74; 797.94) |
| 2001  | 380.99<br>(371.75; 390.23) | 472.83*<br>(460.05; 485.61) | 149.11<br>(142.75; 155.47) | 129.52*<br>(121.02; 138.02) | 53.43<br>(49.35; 57.51) | 70.27*<br>(63.11; 77.43) | 28.28<br>(25.46; 31.1)    | 23.79<br>(20.01; 27.57)  | 671.97<br>(659.07; 684.87)    | 762.99*<br>(744.61; 781.37) |
| 2002  | 390.42<br>(381.06; 399.78) | 481.41*<br>(468.55; 494.27) | 145.18<br>(138.9; 151.46)  | 135.95<br>(127.37; 144.53)  | 49.84<br>(45.94; 53.74) | 72.49*<br>(65.23; 79.75) | 28.59<br>(25.79; 31.39)   | 25.42<br>(21.64; 29.2)   | 678.83<br>(665.89; 691.77)    | 794.75*<br>(776.01; 813.49) |
| 2003  | 367.46<br>(358.46; 376.46) | 481.77*<br>(468.75; 494.79) | 145.16<br>(138.92; 151.4)  | 133.71<br>(125.07; 142.35)  | 48.90<br>(45.04; 52.76) | 76.32*<br>(68.84; 83.8)  | 29.38<br>(26.54; 32.22)   | 23.27<br>(19.65; 26.89)  | 654.17<br>(641.53; 666.81)    | 788.38*<br>(769.54; 807.22) |
| 2004  | 369.32<br>(360.42; 378.22) | 482.7*<br>(469.56; 495.84)  | 142.22<br>(136.06; 148.38) | 134.23<br>(125.53; 142.93)  | 47.02<br>(43.2; 50.84)  | 73.64*<br>(66.3; 80.98)  | 28.72<br>(25.96; 31.48)   | 28.51<br>(24.57; 32.45)  | 649.84<br>(637.32; 662.36)    | 794.87*<br>(775.85; 813.89) |
| 2005  | 371.85<br>(363.05; 380.65) | 500.1*<br>(486.72; 513.48)  | 143.69<br>(137.57; 149.81) | 131.23<br>(122.75; 139.71)  | 49.83<br>(45.95; 53.71) | 87.45<br>(79.33; 95.57)  | 31.74<br>(28.82; 34.66)   | 36.52<br>(31.82; 41.22)  | 663.48<br>(650.92; 676.04)    | 833.23*<br>(813.69; 852.77) |
| 2006  | 382.74<br>(373.9; 391.58)  | 493.89*<br>(480.51; 507.27) | 135.94<br>(130.04; 141.84) | 131.44<br>(122.82; 140.06)  | 53.69<br>(49.55; 57.83) | 82.10*<br>(74.26; 89.94) | 38.84<br>(35.6; 42.08)    | 43.12<br>(37.96; 48.28)  | 682.58<br>(669.86; 695.3)     | 827.46*<br>(807.78; 847.14) |
| 2007  | 361.74<br>(353.24; 370.24) | 477.96*<br>(464.74; 491.18) | 137.33<br>(131.39; 143.27) | 128.3<br>(119.8; 136.8)     | 47.33<br>(43.45; 51.21) | 80.08*<br>(72.4; 87.76)  | 45.38<br>(41.86; 48.9)    | 49.53<br>(43.97; 55.09)  | 668.31<br>(655.75; 680.87)    | 814.01*<br>(794.51; 833.51) |
| 2008  | 340.89<br>(332.85; 348.93) | 464.44*<br>(451.5; 477.38)  | 148.32<br>(142.12; 154.52) | 133.55<br>(124.75; 142.35)  | 46.77<br>(42.95; 50.59) | 73.99*<br>(66.51; 81.47) | 42.89<br>(39.47; 46.31)   | 48.07<br>(42.55; 53.59)  | 651.69<br>(639.45; 663.93)    | 793.99*<br>(774.67; 813.31) |
| 2009  | 329.82<br>(322.04; 337.6)  | 444.46*<br>(431.9; 457.02)  | 137.39<br>(131.49; 143.29) | 127.70<br>(119.1; 136.3)    | 35.53<br>(32.17; 38.89) | 62.25*<br>(55.35; 69.15) | 36.00<br>(32.92; 39.08)   | 39.41<br>(34.61; 44.21)  | 599.62<br>(588.14; 611.1)     | 745.84*<br>(727.3; 764.38)  |
| 2010  | 328.22<br>(320.56; 335.88) | 438.68*<br>(426.38; 450.98) | 128.69<br>(123.03; 134.35) | 133.46<br>(124.72; 142.2)   | 39.63<br>(36.07; 43.19) | 56.38*<br>(49.92; 62.84) | 35.17<br>(32.13; 38.21)   | 37.33<br>(32.63; 42.03)  | 596.16<br>(584.78; 607.54)    | 729.2*<br>(711.18; 747.22)  |
| 2011  | 310.44<br>(303.08; 317.8)  | 413.01*<br>(401.03; 424.99) | 135.91<br>(130.05; 141.77) | 130.71<br>(121.97; 139.45)  | 37.98<br>(34.52; 41.44) | 53.31*<br>(46.95; 59.67) | 34.57<br>(31.55; 37.59)   | 34.80<br>(30.18; 39.42)  | 575.46<br>(564.36; 586.56)    | 701.43*<br>(683.37; 719.49) |
| 2012  | 313.19<br>(305.91; 320.47) | 391.51*<br>(379.99; 403.03) | 129.69<br>(123.95; 135.43) | 124.78<br>(116.46; 133.1)   | 35.89<br>(32.53; 39.25) | 55.82*<br>(49.24; 62.4)  | 31.39<br>(28.51; 34.27)   | 39.45*<br>(34.57; 44.33) | 569.668<br>(558.688; 580.648) | 673.58*<br>(656.16; 691)    |
| 2013  | 304.42<br>(297.3; 311.54)  | 393.69*<br>(382.15; 405.23) | 129.56<br>(123.86; 135.26) | 121.81<br>(113.55; 130.07)  | 34.4<br>(31.08; 37.72)  | 52.28*<br>(45.9; 58.66)  | 38.20<br>(35; 41.4)       | 37.42<br>(32.72; 42.12)  | 571.44<br>(560.46; 582.42)    | 674.63*<br>(657.23; 692.03) |
| 2014  | 293.48<br>(286.54; 300.42) | 367.3*<br>(356.28; 378.32)  | 126.32<br>(120.74; 131.9)  | 122.05<br>(113.65; 130.45)  | 32.39<br>(29.17; 35.61) | 44.84*<br>(38.84; 50.84) | 33.68<br>(30.72; 36.64)   | 36.45<br>(31.77; 41.13)  | 548.02<br>(537.34; 558.7)     | 641.54*<br>(624.44; 658.64) |
| 2015  | 297.54                     | 391.28*                     | 132.57                     | 131.19                      | 33.25                   | 45.72*                   | 34.6                      | 36.57                    | 562.01                        | 673.77*                     |

|      |                            |                            |                            |                            |                         |                         |                         |                         |                            |                             |
|------|----------------------------|----------------------------|----------------------------|----------------------------|-------------------------|-------------------------|-------------------------|-------------------------|----------------------------|-----------------------------|
|      | (290.7; 304.38)            | (379.92; 402.64)           | (126.83; 138.31)           | (122.47; 139.91)           | (29.97; 36.53)          | (39.72; 51.72)          | (31.56; 37.64)          | (31.95; 41.19)          | (551.27; 572.75)           | (656.41; 691.13)            |
| 2016 | 289.88<br>(283.12; 296.64) | 365.02*<br>(354; 376.04)   | 133.74<br>(127.92; 139.56) | 123.35<br>(115.03; 131.67) | 30.77<br>(27.63; 33.91) | 38<br>(32.64; 43.36)    | 33.41<br>(30.41; 36.41) | 34.38<br>(29.88; 38.88) | 554.89<br>(544.17; 565.61) | 631.8*<br>(615.08; 648.52)  |
| 2017 | 273.34<br>(266.92; 279.76) | 360.4*<br>(349.48; 371.32) | 124.54<br>(118.96; 130.12) | 131.34<br>(122.54; 140.14) | 32.21<br>(28.97; 35.45) | 37.04<br>(31.76; 42.32) | 31.18<br>(28.3; 34.06)  | 35.13<br>(30.65; 39.61) | 534.49<br>(524.09; 544.89) | 633.95*<br>(617.25; 650.65) |
| 2018 | 267.77<br>(261.35; 274.19) | 338.8*<br>(328.42; 349.18) | 125.92<br>(120.32; 131.52) | 123.05<br>(114.51; 131.59) | 28.92<br>(25.88; 31.96) | 36.9<br>(31.56; 42.24)  | 30.19<br>(27.37; 33.01) | 29.09<br>(25.09; 33.09) | 526.06<br>(515.7; 536.42)  | 607.97*<br>(591.51; 624.43) |

CI, confidence intervals.

\*p < 0.05 compared to urban areas.

Table S6. Trends in age-standardized mortality rates among men by place of residence during 1990-2018.

| Causes of deaths          | Area  | Number of cut-off points | Years of cut-off point | Period 1      |                                  | Period 2      |                                  | Period 3      |                                     | Period 4      |                                   | All period (1990-2018)           |
|---------------------------|-------|--------------------------|------------------------|---------------|----------------------------------|---------------|----------------------------------|---------------|-------------------------------------|---------------|-----------------------------------|----------------------------------|
|                           |       |                          |                        | Years         | AAC (95% CI), p                  | Years         | AAC (95% CI), p                  | Years         | AAC (95% CI), p                     | Years         | AAC (95% CI), p                   | AAC (95% CI), p                  |
| Cardiovascular diseases   | Urban | 3                        | 1994<br>1998<br>2006   | 1990-<br>1994 | 2.48 (-0.16, 5.20),<br>0.06465   | 1994-<br>1998 | -4.87 (-8.72, -0.85),<br>0.02042 | 1998-<br>2006 | 0.91 (-0.20, 2.04),<br>0.10167      | 2006-<br>2018 | -2.41 (-2.88, -1.93),<br>0.00000  | -1.16 (-1.40, -0.91),<br>0.00000 |
|                           | Rural | 3                        | 1994<br>2000<br>2005   | 1990-<br>1994 | 3.39 (0.26; 6.60),<br>0.03465    | 1994-<br>2000 | -2.81 (-4.89; -0.68),<br>0.01245 | 2000-<br>2005 | 2.68 (-0.42; 5.87),<br>0.08761      | 2005-<br>2018 | -2.69 (-3.19; -2.19),<br>0.00000  | -1.00 (-1.32; -0.69),<br>0.00000 |
| Cancer                    | Urban | 0                        | -                      | -             | -                                | -             | -                                | -             | -                                   | -             | -                                 | -0.37 (-0.50; -0.24),<br>0.00000 |
|                           | Rural | 3                        | 1992<br>2007<br>2015   | 1990-<br>1992 | 5.45 (-1.50; 12.89),<br>0.12050  | 1992-<br>2007 | -0.06 (-0.38; 0.26),<br>0.11709  | 2007-<br>2015 | -0.83 (-1.73; 0.08),<br>0.10900     | 2015-<br>2018 | -2.10 (-5.38; 1.29),<br>0.45595   | -0.27 (-0.46; -0.08),<br>0.00611 |
| External causes           | Urban | 3                        | 1994<br>1998<br>2006   | 1990-<br>1994 | 13.63 (7.52; 20.08),<br>0.00009  | 1994-<br>1998 | -7.72 (-15.43; 0.70),<br>0.06950 | 1998-<br>2006 | 0.70 (-1.62; 3.08),<br>0.54119      | 2006-<br>2018 | -4.95 (-5.92; -3.96),<br>0.00000  | -2.05 (-2.69; -1.40),<br>0.00000 |
|                           | Rural | 3                        | 1994<br>1997<br>2007   | 1990-<br>1994 | 10.38 (5.58, 15.39),<br>0.00015  | 1994-<br>1997 | -5.66 (-18.02, 8.57),<br>0.39827 | 1997-<br>2007 | -0.49 (-1.75, 0.80),<br>0.43901     | 2007-<br>2018 | -6.69 (-7.57, -5.80),<br>0.00000  | -2.56 (-3.29, -1.84),<br>0.00000 |
| Gastrointestinal diseases | Urban | 3                        | 1992<br>2002<br>2007   | 1990-<br>1992 | 15.90 (-7.76, 45.65),<br>0.19337 | 1992-<br>2002 | 2.20 (0.09, 4.36),<br>0.04128    | 2002-<br>2007 | 11.39 (3.63, 19.74),<br>0.00534     | 2007-<br>2018 | -3.04 (-4.52, -1.54 ),<br>0.00043 | 2.85 (2.05, 3.66),<br>0.00000    |
|                           | Rural | 3                        | 1993<br>2004<br>2007   | 1990-<br>1993 | 10.71 (-0.84, 23.60),<br>0.06841 | 1993-<br>2004 | 3.30 (1.55, 5.09),<br>0.00075    | 2004-<br>2007 | 20.69 (-3.17,<br>50.43),<br>0.09033 | 2007-<br>2018 | -3.65 (-5.07, -2.21),<br>0.00004  | 3.55 (2.63, 4.47),<br>0.00000    |
| All causes                | Urban | 3                        | 1994<br>1999<br>2006   | 1990-<br>1994 | 4.91 (2.05, 7.85),<br>0.00164    | 1994-<br>1999 | -4.45 (-7.06, -1.78),<br>0.00252 | 1999-<br>2006 | 1.63 (0.14, 3.14),<br>0.03303       | 2006-<br>2018 | -2.21 (-2.71, -1.70),<br>0.00000  | -0.86 (-1.14, -0.57),<br>0.00000 |
|                           | Rural | 3                        | 1994<br>2000<br>2006   | 1990-<br>1994 | 4.99 (2.46, 7.60),<br>0.00045    | 1994-<br>2000 | -2.93 (-4.59, -1.23),<br>0.00179 | 2000-<br>2006 | 1.81 (0.06, 3.58),<br>0.04278       | 2006-<br>2018 | -3.08 (-3.53, -2.63),<br>0.00000  | -1.07 (-1.42, -0.72),<br>0.00000 |

AAC, average annual changes; CI, confidence intervals.



Table S7. Trends in age-standardized mortality rates among women by place of residence during 1990-2018.

| Causes of deaths          | Area  | Number of cut-off points | Years of cut-off point | Period 1      |                                 | Period 2      |                                   | Period 3      |                                   | Period 4      |                                  | All period (1990-2018)           |
|---------------------------|-------|--------------------------|------------------------|---------------|---------------------------------|---------------|-----------------------------------|---------------|-----------------------------------|---------------|----------------------------------|----------------------------------|
|                           |       |                          |                        | Years         | ACC (95% CI), p                 | Years         | ACC (95% CI), p                   | Years         | ACC (95% CI), p                   | Years         | ACC (95% CI), p                  | ACC (95% CI), p                  |
| Cardiovascular diseases   | Urban | 3                        | 1995<br>1999<br>2006   | 1990-<br>1995 | 0.96 (-0.75; 2.70),<br>0.25625  | 1995-<br>1999 | -4.03 (-7.63; -0.29),<br>0.03602  | 1999-<br>2006 | -0.79 (-2.06; 0.50),<br>0.21654   | 2006-<br>2018 | -2.57 (-3.01; -2.13),<br>0.00000 | -1.85 (-2.03; -1.67),<br>0.00000 |
|                           | Rural | 3                        | 1997<br>2000<br>2005   | 1990-<br>1997 | 0.91 (-0.47, 2.30),<br>0.18604  | 1997-<br>2000 | -4.86 (-14.16, 5.45),<br>0.25179  | 2000-<br>2005 | 1.25 (-1.99, 4.60),<br>0.24373    | 2005-<br>2018 | -2.86 (-3.38, -2.33),<br>0.01626 | -1.48 (-1.76, -1.21),<br>0.00000 |
| Cancer                    | Urban | 0                        | -                      | -             | -                               | -             | -                                 | -             | -                                 | -             | -                                | -0.69 (-0.83, -0.55),<br>0.00000 |
|                           | Rural | 0                        | -                      | -             | -                               | -             | -                                 | -             | -                                 | -             | -                                | -0.22 (-0.38, -0.06),<br>0.00911 |
| External causes           | Urban | 3                        | 1994<br>1997<br>2006   | 1990-<br>1994 | 12.42 (6.24, 18.96),<br>0.00031 | 1994-<br>1997 | -7.83 (-22.93, 10.23),<br>0.35418 | 1997-<br>2006 | -1.19 (-3.10, 0.76),<br>0.21764   | 2006-<br>2018 | -4.25 (-5.26, -3.24),<br>0.00000 | -2.30 (-2.87, -1.72),<br>0.00000 |
|                           | Rural | 3                        | 1994<br>2002<br>2005   | 1990-<br>1994 | 6.97 (1.28, 12.98),<br>0.01815  | 1994-<br>2002 | -2.06 (-4.29, 0.23),<br>0.07561   | 2002-<br>2005 | 6.69 (-10.25, 26.83),<br>0.44473  | 2005-<br>2018 | -6.62 (-7.46, -5.77),<br>0.00000 | -2.30 (-3.07, -1.53),<br>0.00000 |
| Gastrointestinal diseases | Urban | 3                        | 2004<br>2007<br>2010   | 1990-<br>2004 | 3.03 (1.91, 4.17),<br>0.00001   | 2004-<br>2007 | 14.94 (-9.04, 45.23),<br>0.22953  | 2007-<br>2010 | -7.60 (-26.87, 16.75),<br>0.48991 | 2010-<br>2018 | -1.31 (-3.80, 1.24),<br>0.29430  | 2.27 (1.59, 2.96),<br>0.00000    |
|                           | Rural | 3                        | 2003<br>2007<br>2010   | 1990-<br>2003 | 3.92 (2.88, 4.96),<br>0.00000   | 2003-<br>2007 | 19.57 (8.69, 31.54),<br>0.00084   | 2007-<br>2010 | -8.99 (-24.80, 10.15),<br>0.31660 | 2010-<br>2018 | -1.90 (-3.92, 0.16),<br>0.06887  | 3.74 (2.79, 4.69),<br>0.00000    |
| All causes                | Urban | 3                        | 1994<br>1999<br>2006   | 1990-<br>1994 | 2.71 (0.04, 5.45),<br>0.04661   | 1994-<br>1999 | -3.57 (-6.07, -0.99),<br>0.00917  | 1999-<br>2006 | -0.28 (-1.67, 1.14),<br>0.68613   | 2006-<br>2018 | -1.97 (-2.45, -1.48),<br>0.00000 | -1.38 (-1.57, -1.20),<br>0.00000 |
|                           | Rural | 3                        | 1994<br>2001<br>2005   | 1990-<br>1994 | 3.04 (0.45, 5.78),<br>0.02356   | 1994-<br>2001 | -2.57 (-3.90, -1.21),<br>0.00079  | 2001-<br>2005 | 2.03 (-2.06, 6.28),<br>0.31894    | 2005-<br>2018 | -2.43 (-2.85, -2.02),<br>0.00000 | -1.23 (-1.47, -0.98),<br>0.00000 |

AAC, average annual changes; CI, confidence interval.

Table S8. Age-standardized mortality rate differences (rural-urban) among men and women during 1990-2018 (100,000 population).

| Years | Cardiovascular diseases    |                            | Cancer                    |                            | External causes            |                         | Gastrointestinal diseases  |                         | All causes                 |                            |
|-------|----------------------------|----------------------------|---------------------------|----------------------------|----------------------------|-------------------------|----------------------------|-------------------------|----------------------------|----------------------------|
|       | Men                        | Women                      | Men                       | Women                      | Men                        | Women                   | Men                        | Women                   | Men                        | Women                      |
| 1990  | 38.01<br>(36.55; 39.47)    | 82.7<br>(80.42; 84.98)     | -4.81<br>(-6.39; -3.23)   | -23.05<br>(-24.41; -21.69) | 97.34<br>(91.4; 103.28)    | 20.2<br>(17.24; 23.16)  | -5.22<br>(-5.58; -4.86)    | -6.40<br>(-6.58; -6.22) | 200.18<br>(194.76; 205.60) | 88.5<br>(84.50; 92.5)      |
| 1991  | 79.26<br>(76.86; 81.66)    | 78.51<br>(40.33; 43.21)    | -10.54<br>(-12.16; -8.92) | -23.49<br>(-24.83; -22.15) | 128.27<br>(121.27; 135.27) | 20.2<br>(17.12; 23.28)  | -7.77<br>(-8.13; -7.41)    | -4.18<br>(-4.5; -3.86)  | 255<br>(248.36; 261.64)    | 90.77<br>(86.45; 95.09)    |
| 1992  | 70.32<br>(67.74; 72.9)     | 60.69<br>(58.47; 62.91)    | 25.54<br>(22.96; 28.12)   | -7.6<br>(-9.48; -5.72)     | 114.03<br>(107.37; 120.69) | 23.16<br>(19.92; 26.4)  | -10.79<br>(-11.03; -10.55) | -4.41<br>(-6.79; -6.03) | 265.8<br>(258.82; 272.78)  | 100.19<br>(95.71; 104.67)  |
| 1993  | 97.24<br>(93.94; 100.54)   | 89.98<br>(87.4; 92.56)     | 9.64<br>(7.46; 11.82)     | -11.66<br>(-13.46; -9.86)  | 98.76<br>(92.24; 105.28)   | 13.51<br>(10.59; 16.43) | -3<br>(-3.88; -2.12)       | -2.37<br>(-2.85; -1.89) | 298.89<br>(291.17; 306.61) | 139.35<br>(134.47; 144.23) |
| 1994  | 56.13<br>(53.30; 58.98)    | 56.48<br>(54; 58.96)       | 3.65<br>(1.47; 5.83)      | -23.56<br>(-25.08; -22.04) | 130.04<br>(122.76; 137.32) | 15.1<br>(11.96; 18.24)  | -9.53<br>(-10.15; -8.91)   | -5.56<br>(-6.04; -5.08) | 253.15<br>(245.49; 260.81) | 96.48<br>(91.52; 101.44)   |
| 1995  | 116.93<br>(113.15; 120.71) | 93.75<br>(90.75; 96.75)    | 1.47<br>(-0.75; 3.69)     | -22.67<br>(-24.21; -21.13) | 122.56<br>(115.46; 129.66) | 19.22<br>(15.94; 22.5)  | -10.18<br>(-10.90; -9.46)  | -4.35<br>(-4.99; -3.71) | 275.35<br>(267.25; 283.45) | 98.52<br>(93.56; 103.48)   |
| 1996  | 140.06<br>(135.78; 144.34) | 106.37<br>(103.17; 109.57) | 22.52<br>(19.48; 25.56)   | -20.63<br>(-22.45; -18.81) | 127.02<br>(119.94; 134.10) | 26.14<br>(22.5; 29.78)  | -5.11<br>(-5.99; -4.23)    | -1.20<br>(-2; -0.4)     | 336.58<br>(327.82; 345.34) | 127.36<br>(121.92; 132.8)  |
| 1997  | 107.55<br>(103.49; 111.61) | 119.52<br>(116.1; 122.94)  | 22.49<br>(19.39; 25.59)   | -17.89<br>(-19.83; -15.95) | 123.23<br>(116.29; 130.17) | 23.55<br>(20.15; 26.95) | -6.36<br>(-7.20; -5.52)    | -1.56<br>(-2.5; -0.62)  | 303.74<br>(295.12; 312.36) | 142.54<br>(136.94; 148.14) |
| 1998  | 108.97<br>(104.79; 113.15) | 118.29<br>(114.75; 121.83) | 27.39<br>(24.13; 30.65)   | -10.77<br>(-13.03; -8.51)  | 129.21<br>(122.31; 136.11) | 17.29<br>(14.15; 20.43) | -2.45<br>(-3.73; -1.17)    | -4.22<br>(-4.92; -3.52) | 333.17<br>(324.29; 342.05) | 135.32<br>(129.74; 140.9)  |
| 1999  | 117.65<br>(113.13; 122.17) | 107.24<br>(103.6; 110.88)  | 37.93<br>(34.39; 41.47)   | -8.3<br>(-10.6; -6)        | 149.55<br>(142.17; 156.93) | 26.77<br>(23.09; 30.45) | -6.9<br>(-7.86; -5.94)     | -7.14<br>(-7.84; -6.44) | 359.66<br>(350.44; 368.88) | 137.96<br>(132; 143.92)    |
| 2000  | 90.75<br>(86.49; 95.01)    | 91.65<br>(88.17; 95.13)    | 12.56<br>(9.58; 15.54)    | -6.92<br>(-9.32; -4.52)    | 101.25<br>(95.03; 107.47)  | 27.02<br>(23.43; 30.55) | -12.5<br>(-13.10; -11.90)  | -4.77<br>(-5.43; -4.11) | 245.29<br>(237.07; 253.51) | 117.96<br>(112.26; 123.66) |
| 2001  | 95.59<br>(91.13; 100.05)   | 91.84<br>(88.3; 95.38)     | 8.58<br>(5.68; 11.48)     | -19.59<br>(-21.73; -17.45) | 122.36<br>(115.6; 129.12)  | 16.84<br>(13.76; 19.92) | -8.61<br>(-9.61; -7.61)    | -4.49<br>(-5.36; -3.53) | 277.04<br>(268.34; 285.74) | 91.02<br>(85.54; 96.5)     |
| 2002  | 113.15<br>(108.27; 118.03) | 90.99<br>(87.49; 94.49)    | 26.72<br>(23.38; 30.06)   | -9.23<br>(-11.53; -6.93)   | 129.37<br>(122.47; 136.27) | 22.65<br>(19.29; 26.01) | -3.75<br>(-5.11; -2.39)    | -3.17<br>(-4.15; -2.19) | 315.47<br>(306.29; 324.65) | 115.92<br>(110.12; 121.72) |
| 2003  | 159.98<br>(154.22; 165.74) | 114.31<br>(110.29; 118.33) | 13.76<br>(10.64; 16.88)   | -11.45<br>(-13.85; -9.05)  | 123.44<br>(116.7; 130.18)  | 27.42<br>(23.8; 31.04)  | -9.45<br>(-10.61; -8.29)   | -6.11<br>(-6.89; -5.33) | 343.3<br>(333.68; 352.92)  | 134.21<br>(128.01; 140.41) |
| 2004  | 112.94<br>(107.42; 118.46) | 113.38<br>(109.14; 117.62) | 31.73<br>(28.07; 35.39)   | -7.99<br>(-10.53; -5.45)   | 124.49<br>(117.79; 131.19) | 26.62<br>(23.1; 30.14)  | -7.15<br>(-8.39; -5.91)    | -0.21<br>(-1.39; 0.97)  | 318.36<br>(308.62; 328.1)  | 145.03<br>(138.53; 151.53) |
| 2005  | 134.13<br>(127.91; 140.35) | 128.25<br>(123.67; 132.83) | 33.87<br>(30.01; 37.73)   | -12.46<br>(-14.82; -10.1)  | 125.53<br>(118.67; 132.39) | 37.62<br>(33.38; 41.86) | -8.22<br>(-9.62; -6.82)    | 4.78<br>(3; 6.56)       | 341.82<br>(331.38; 352.26) | 169.75<br>(162.77; 176.73) |
| 2006  | 138.01<br>(131.59; 144.43) | 111.15<br>(106.61; 115.69) | 12.92<br>(9.36; 16.48)    | -4.5<br>(-7.22; -1.78)     | 108.87<br>(102.47; 115.27) | 28.41<br>(24.71; 32.11) | -4.15<br>(-5.95; -2.35)    | 4.32<br>(2.36; 6.2)     | 287.9<br>(277.78; 298.02)  | 144.88<br>(137.92; 151.84) |
| 2007  | 126.79<br>(120.17; 133.41) | 116.22<br>(111.5; 120.94)  | 14.05<br>(10.37; 17.73)   | -9.03<br>(-11.59; -6.47)   | 120.1<br>(113.3; 126.9)    | 32.75<br>(28.95; 36.55) | -3.98<br>(-6.12; -1.84)    | 4.15<br>(2.11; 6.19)    | 291.43<br>(280.85; 302.01) | 145.7<br>(138.76; 152.64)  |
| 2008  | 117.99<br>(111.49; 124.49) | 123.55<br>(118.65; 128.45) | 19.63<br>(15.77; 23.49)   | -14.77<br>(-17.37; -12.17) | 109.18<br>(102.66; 115.7)  | 27.22<br>(23.56; 30.88) | -4.25<br>(-6.29; -2.21)    | 5.18<br>(3.08; 7.28)    | 293.03<br>(282.41; 303.65) | 142.3<br>(135.22; 149.38)  |
| 2009  | 92.41<br>(86.29; 98.53)    | 114.64<br>(109.86; 119.42) | 13.8<br>(10.10; 17.50)    | -9.69<br>(-12.39; -6.99)   | 89.47<br>(83.51; 195.43)   | 26.72<br>(23.18; 30.26) | 3.1<br>(0.88; 5.32)        | 3.41<br>(1.69; 5.13)    | 235.33<br>(225.47; 245.19) | 146.22<br>(139.16; 153.28) |
| 2010  | 120.59<br>(113.93; 127.25) | 110.46<br>(105.82; 115.10) | 7.57<br>(3.97; 10.62)     | 4.77<br>(1.69; 7.85)       | 97.04<br>(90.94; 103.14)   | 16.75<br>(13.85; 19.65) | -4.53<br>(-6.43; -2.63)    | 2.16<br>(0.5; 3.82)     | 246.77<br>(236.65; 256.89) | 133.04<br>(126.4; 139.68)  |
| 2011  | 97.75<br>(91.25; 104.25)   | 102.57<br>(97.95; 107.19)  | 26.94<br>(22.76; 31.12)   | -5.2<br>(-8.08; -2.32)     | 67.96<br>(62.76; 73.16)    | 15.33<br>(12.43; 18.23) | 1.03<br>(-0.95; 3.01)      | 0.23<br>(-1.37; 1.83)   | 215.8<br>(205.94; 225.66)  | 125.97<br>(119.01; 132.93) |
| 2012  | 82.33                      | 78.32                      | 16.41                     | -4.91                      | 65.91                      | 19.93                   | -1.38                      | 8.06                    | 186                        | 103.91                     |

|      |                           |                         |                         |                           |                         |                         |                          |                        |                            |                            |
|------|---------------------------|-------------------------|-------------------------|---------------------------|-------------------------|-------------------------|--------------------------|------------------------|----------------------------|----------------------------|
|      | (75.97; 88.69)            | (74.08; 82,56)          | (12.53; 20.29)          | (-7,49; -2,33)            | (60,69; 71,13)          | (16,71; 23,15)          | (-3,30; 0,54)            | (6,06; 10,06)          | (176,36; 195,64)           | (97,48; 110,4)             |
| 2013 | 103.21<br>(96.61; 109.81) | 89.27<br>(84,85; 93,69) | 20.44<br>(16.44; 24.44) | -7,75<br>(-10,31; -5,19)  | 53.97<br>(49,07; 58,87) | 17,88<br>(14,82; 20,94) | -3.99<br>(-5,83; -2,15)  | -0,78<br>(-2,28; 0,72) | 197,12<br>(187,40; 206,84) | 103,19<br>(96,77; 109,61)  |
| 2014 | 92.13<br>(85.71; 598.55)  | 73.82<br>(69,74; 77,90) | 16.12<br>(12.14; 20.10) | -4,27<br>(-7,09; -1,45)   | 64.31<br>(59,19; 69,43) | 12,45<br>(9,67; 15,23)  | -1.74<br>(-3,52; 0,04)   | 2,77<br>(1,05; 4,49)   | 192,96<br>(183,24; 202,68) | 93,52<br>(87,1; 99,94)     |
| 2015 | 97.46<br>(90.84; 104.08)  | 93.74<br>(89,22; 98,26) | 21.08<br>(17.04; 25.12) | -1,38<br>(-4,36; 1,6)     | 40.97<br>(36,49; 45,45) | 12,47<br>(9,75; 15,19)  | -6.48<br>(-8,08; -4,88)  | 1,97<br>(0,39; 3,55)   | 170,17<br>(160,77; 179,57) | 111,76<br>(105,14; 118,38) |
| 2016 | 86.56<br>(80.26; 92.86)   | 75.14<br>(70,88; 79,40) | 2.90<br>(-0.72; 6.52)   | -10,39<br>(-12,89; -7,89) | 36.8<br>(32,58; 41,02)  | 7,23<br>(5,01; 9,45)    | -9.63<br>(-11,11; -8,15) | 0,97<br>(-0,53; 2,47)  | 120,26<br>(111,46; 129,06) | 76,91<br>(70,91; 82,91)    |
| 2017 | 74.68<br>(68.66; 80.7)    | 87.06<br>(82,56; 91,56) | 26.59<br>(22.57; 30.61) | 6,8<br>(3,58; 10,02)      | 45.27<br>(40,83; 49,71) | 4,83<br>(2,79; 6,87)    | -8.69<br>(-10,11; -7,27) | 3,95<br>(2,35; 5,55)   | 142,66<br>(133,84; 151,48) | 99,46<br>(93,16; 105,76)   |
| 2018 | 59.86<br>(54.18; 65.54)   | 71.03<br>(67,07; 74,99) | -0.50<br>(-3.86; 2.86)  | -2,87<br>(-5,81; 0,07)    | 37.59<br>(33,61; 41,57) | 7,98<br>(5,68; 10,28)   | 4.36<br>(2,22; 6,50)     | -1,10<br>(-2,28; 0,08) | 93,68<br>(85,54; 101,82)   | 81,91<br>(75,81; 88,01)    |

Table S9. Age-standardized mortality rate ratio (rural/urban) among men and women during 1990-2018.

| Years | Cardiovascular diseases |                     | Cancer              |                     | External causes     |                     | Gastrointestinal diseases |                     | All causes          |                      |
|-------|-------------------------|---------------------|---------------------|---------------------|---------------------|---------------------|---------------------------|---------------------|---------------------|----------------------|
|       | Men                     | Women               | Men                 | Women               | Men                 | Women               | Men                       | Women               | Men                 | Women                |
| 1990  | 1.05<br>(0.98;1.13)     | 1.19<br>(1.09;1.29) | 0.98<br>(0.87;1.10) | 0.85<br>(0.70;1.00) | 1.54<br>(1.37;1.74) | 1.46<br>(1.12;1.86) | 0.84<br>(0.55;1.21)       | 0.70<br>(0.39;1.15) | 1.15<br>(1.09;1.2)  | 1.12<br>(1.04;1.2)   |
| 1991  | 1.11<br>(1.04;1.2)      | 1.18<br>(1.08;1.29) | 0.96<br>(0.85;1.08) | 0.84<br>(0.70;1.00) | 1.62<br>(1.45;1.81) | 1.42<br>(1.1;1.79)  | 0.8<br>(0.54;1.13)        | 0.78<br>(0.41;1.26) | 1.18<br>(1.13;1.24) | 1.12<br>(1.05;1.2)   |
| 1992  | 1.10<br>(1.02;1.18)     | 1.14<br>(1.04;1.25) | 1.09<br>(0.97;1.22) | 0.95<br>(0.79;1.12) | 1.54<br>(1.38;1.72) | 1.47<br>(1.14;1.84) | 0.76<br>(0.52;1.06)       | 0.79<br>(0.45;1.25) | 1.19<br>(1.13;1.24) | 1.14<br>(1.06;1.22)  |
| 1993  | 1.13<br>(1.05;1.2)      | 1.20<br>(1.1;1.3)   | 1.03<br>(0.92;1.15) | 0.92<br>(0.78;1.09) | 1.37<br>(1.23;1.51) | 1.22<br>(0.96;1.53) | 0.93<br>(0.66;1.26)       | 0.88<br>(0.5;1.39)  | 1.19<br>(1.14;1.24) | 1.18<br>(1.1;1.25)   |
| 1994  | 1.07<br>(1;1.15)        | 1.12<br>(1.03;1.22) | 1.01<br>(0.9;1.13)  | 0.85<br>(0.71;1.01) | 1.44<br>(1.31;1.58) | 1.22<br>(0.97;1.51) | 0.80<br>(0.57;1.09)       | 0.75<br>(0.42;1.18) | 1.15<br>(1.1;1.21)  | 1.12<br>(1.05;1.19)  |
| 1995  | 1.16<br>(1.09;1.24)     | 1.2<br>(1.11;1.31)  | 1.00<br>(0.89;1.12) | 0.85<br>(0.71;1.01) | 1.43<br>(1.3;1.58)  | 1.30<br>(1.03;1.61) | 0.80<br>(0.57;1.08)       | 0.82<br>(0.48;1.25) | 1.17<br>(1.12;1.23) | 1.12<br>(1.05;1.2)   |
| 1996  | 1.2<br>(1.12;1.29)      | 1.25<br>(1.14;1.36) | 1.08<br>(0.96;1.2)  | 0.86<br>(0.72;1.02) | 1.53<br>(1.38;1.7)  | 1.44<br>(1.15;1.77) | 0.89<br>(0.63;1.2)        | 0.94<br>(0.56;1.45) | 1.23<br>(1.17;1.29) | 1.17<br>(1.09;1.25)  |
| 1997  | 1.16<br>(1.08;1.25)     | 1.29<br>(1.18;1.4)  | 1.08<br>(0.96;1.21) | 0.88<br>(0.73;1.04) | 1.54<br>(1.38;1.71) | 1.45<br>(1.14;1.82) | 0.86<br>(0.62;1.17)       | 0.93<br>(0.56;1.41) | 1.22<br>(1.16;1.28) | 1.2<br>(1.12;1.29)   |
| 1998  | 1.17<br>(1.09;1.26)     | 1.29<br>(1.18;1.4)  | 1.10<br>(0.98;1.22) | 0.93<br>(0.78;1.09) | 1.58<br>(1.42;1.76) | 1.32<br>(1.03;1.66) | 0.95<br>(0.69;1.25)       | 0.84<br>(0.52;1.27) | 1.25<br>(1.19;1.31) | 1.19<br>(1.11;1.28)  |
| 1999  | 1.18<br>(1.1;1.27)      | 1.27<br>(1.16;1.39) | 1.13<br>(1.01;1.26) | 0.94<br>(0.79;1.11) | 1.72<br>(1.55;1.91) | 1.52<br>(1.2;1.89)  | 0.86<br>(0.62;1.16)       | 0.74<br>(0.44;1.12) | 1.27<br>(1.21;1.34) | 1.2<br>(1.12;1.29)   |
| 2000  | 1.15<br>(1.06;1.24)     | 1.24<br>(1.13;1.36) | 1.04<br>(0.93;1.17) | 0.95<br>(0.8;1.12)  | 1.47<br>(1.31;1.64) | 1.55<br>(1.22;1.93) | 0.76<br>(0.54;1.03)       | 0.81<br>(0.5;1.24)  | 1.19<br>(1.13;1.25) | 1.18<br>(1.1;1.26)   |
| 2001  | 1.15<br>(1.07;1.23)     | 1.24<br>(1.13;1.36) | 1.03<br>(0.91;1.15) | 0.87<br>(0.73;1.03) | 1.53<br>(1.37;1.69) | 1.32<br>(1.02;1.66) | 0.85<br>(0.62;1.12)       | 0.84<br>(0.53;1.24) | 1.2<br>(1.14;1.26)  | 1.14<br>(1.06;1.22)  |
| 2002  | 1.17<br>(1.09;1.26)     | 1.23<br>(1.12;1.35) | 1.10<br>(0.98;1.22) | 0.94<br>(0.78;1.1)  | 1.59<br>(1.43;1.77) | 1.45<br>(1.13;1.82) | 0.93<br>(0.7;1.22)        | 0.89<br>(0.57;1.29) | 1.23<br>(1.17;1.29) | 1.17<br>(1.09;1.26)  |
| 2003  | 1.25<br>(1.16;1.34)     | 1.31<br>(1.2;1.43)  | 1.05<br>(0.93;1.17) | 0.92<br>(0.77;1.09) | 1.57<br>(1.41;1.75) | 1.56<br>(1.22;1.95) | 0.85<br>(0.64;1.11)       | 0.79<br>(0.5;1.17)  | 1.25<br>(1.2;1.32)  | 1.21<br>(1.12;1.29)  |
| 2004  | 1.17<br>(1.09;1.26)     | 1.31<br>(1.19;1.43) | 1.11<br>(0.99;1.24) | 0.94<br>(0.79;1.12) | 1.60<br>(1.43;1.77) | 1.57<br>(1.23;1.96) | 0.88<br>(0.66;1.15)       | 0.99<br>(0.66;1.43) | 1.24<br>(1.18;1.3)  | 1.22<br>(1.14;1.31)  |
| 2005  | 1.2<br>(1.12;1.28)      | 1.34<br>(1.23;1.47) | 1.12<br>(1;1.26)    | 0.91<br>(0.76;1.08) | 1.54<br>(1.38;1.7)  | 1.75<br>(1.40;2.15) | 0.89<br>(0.68;1.13)       | 1.15<br>(0.81;1.59) | 1.24<br>(1.18;1.3)  | 1.26*<br>(1.17;1.34) |
| 2006  | 1.21<br>(1.12;1.29)     | 1.29<br>(1.18;1.41) | 1.04<br>(0.93;1.17) | 0.97<br>(0.81;1.14) | 1.48<br>(1.32;1.64) | 1.53<br>(1.21;1.90) | 0.95<br>(0.76;1.18)       | 1.11<br>(0.8;1.49)  | 1.2<br>(1.14;1.25)  | 1.21<br>(1.13;1.30)  |
| 2007  | 1.19<br>(1.11;1.27)     | 1.32<br>(1.2;1.44)  | 1.05<br>(0.93;1.17) | 0.93<br>(0.78;1.11) | 1.54<br>(1.38;1.71) | 1.69<br>(1.34;2.10) | 0.96<br>(0.78;1.17)       | 1.09<br>(0.81;1.44) | 1.19<br>(1.14;1.25) | 1.22<br>(1.14;1.30)  |
| 2008  | 1.18<br>(1.1;1.27)      | 1.36<br>(1.24;1.49) | 1.07<br>(0.95;1.2)  | 0.90<br>(0.75;1.07) | 1.53<br>(1.37;1.71) | 1.58<br>(1.23;1.97) | 0.96<br>(0.77;1.17)       | 1.12<br>(0.83;1.48) | 1.21<br>(1.15;1.27) | 1.22<br>(1.14;1.31)  |
| 2009  | 1.15<br>(1.07;1.24)     | 1.35<br>(1.22;1.48) | 1.05<br>(0.93;1.17) | 0.93<br>(0.77;1.1)  | 1.49<br>(1.31;1.67) | 1.75<br>(1.34;2.24) | 1.04<br>(0.82;1.28)       | 1.09<br>(0.77;1.48) | 1.18<br>(1.12;1.24) | 1.24<br>(1.16;1.34)  |
| 2010  | 1.2                     | 1.34                | 1.03                | 1.04                | 1.55                | 1.42                | 0.95                      | 1.06                | 1.19                | 1.22                 |

|      |                     |                     |                     |                     |                     |                     |                     |                     |                     |                     |
|------|---------------------|---------------------|---------------------|---------------------|---------------------|---------------------|---------------------|---------------------|---------------------|---------------------|
|      | (1.11;1.29)         | (1.21;1.47)         | (0.91;1.15)         | (0.87;1.22)         | (1.38;1.75)         | (1.07;1.83)         | (0.75;1.17)         | (0.74;1.45)         | (1.13;1.25)         | (1.14;1.32)         |
| 2011 | 1.16<br>(1.08;1.25) | 1.33<br>(1.21;1.47) | 1.1<br>(0.98;1.23)  | 0.96<br>(0.80;1.14) | 1.41<br>(1.23;1.6)  | 1.40<br>(1.05;1.83) | 1.01<br>(0.8;1.26)  | 1.01<br>(0.69;1.39) | 1.17<br>(1.11;1.23) | 1.22<br>(1.13;1.31) |
| 2012 | 1.14<br>(1.06;1.23) | 1.25<br>(1.13;1.38) | 1.06<br>(0.94;1.19) | 0.96<br>(0.80;1.14) | 1.40<br>(1.22;1.59) | 1.56<br>(1.17;2.01) | 0.98<br>(0.77;1.23) | 1.26<br>(0.88;1.7)  | 1.15<br>(1.09;1.21) | 1.18<br>(1.09;1.28) |
| 2013 | 1.18<br>(1.09;1.27) | 1.29<br>(1.17;1.43) | 1.08<br>(0.95;1.21) | 0.94<br>(0.78;1.12) | 1.32<br>(1.15;1.5)  | 1.52<br>(1.13;1.98) | 0.95<br>(0.74;1.18) | 0.98<br>(0.68;1.34) | 1.16<br>(1.1;1.22)  | 1.18<br>(1.09;1.27) |
| 2014 | 1.17<br>(1.08;1.27) | 1.25<br>(1.13;1.39) | 1.06<br>(0.94;1.19) | 0.97<br>(0.80;1.15) | 1.42<br>(1.23;1.62) | 1.38<br>(1.00;1.84) | 0.98<br>(0.76;1.23) | 1.08<br>(0.75;1.48) | 1.16<br>(1.1;1.23)  | 1.17<br>(1.08;1.26) |
| 2015 | 1.18<br>(1.09;1.27) | 1.32<br>(1.19;1.45) | 1.08<br>(0.96;1.21) | 0.99<br>(0.83;1.17) | 1.27<br>(1.10;1.46) | 1.38<br>(1.00;1.83) | 0.91<br>(0.71;1.16) | 1.06<br>(0.74;1.46) | 1.14<br>(1.08;1.2)  | 1.2<br>(1.11;1.29)  |
| 2016 | 1.16<br>(1.07;1.25) | 1.26<br>(1.13;1.4)  | 1.01<br>(0.89;1.14) | 0.92<br>(0.76;1.1)  | 1.25<br>(1.07;1.44) | 1.23<br>(0.87;1.70) | 0.88<br>(0.69;1.11) | 1.03<br>(0.7;1.42)  | 1.1<br>(1.04;1.16)  | 1.14<br>(1.05;1.23) |
| 2017 | 1.14<br>(1.05;1.24) | 1.32<br>(1.18;1.46) | 1.10<br>(0.98;1.24) | 1.05<br>(0.88;1.25) | 1.36<br>(1.17;1.59) | 1.15<br>(0.81;1.58) | 0.88<br>(0.67;1.12) | 1.13<br>(0.78;1.56) | 1.13<br>(1.07;1.19) | 1.19<br>(1.1;1.28)  |
| 2018 | 1.12<br>(1.03;1.22) | 1.27<br>(1.13;1.41) | 0.99<br>(0.88;1.12) | 0.98<br>(0.81;1.17) | 1.33<br>(1.13;1.56) | 1.28<br>(0.89;1.74) | 1.07<br>(0.83;1.35) | 0.96<br>(0.64;1.38) | 1.08<br>(1.02;1.15) | 1.16<br>(1.07;1.25) |
